# Supplementary material for: Spatiotemporal expression patterns of wheat amino acid transporters reveal their putative roles in nitrogen transport and responses to abiotic stress
Source: PubMed Central journal article supplement (PMC5511167; doi:10.1038/s41598-017-04473-3), 2017-07-14

# Spatiotemporal expression patterns of wheat amino acid transporters reveal their putative roles in nitrogen transport and responses to abiotic stress

Yongfang Wan<sup>1</sup>, Robert King<sup>2</sup>, Rowan A.C. Mitchell<sup>1</sup>, Keywan Hassani-Pak<sup>2</sup>, Malcolm J. Hawkesford<sup>1</sup>

1: Plant Sciences Department, Rothamsted Research, Harpenden, Herts, AL5 2JQ, UK.  
 2: Computational and Systems Biology Department, Rothamsted Research, Harpenden, Herts, AL5 2JQ, UK.

**Supplementary Figure S1.**  
 Clustering of 98 wheat, rice, and *Arabidopsis* AATs.

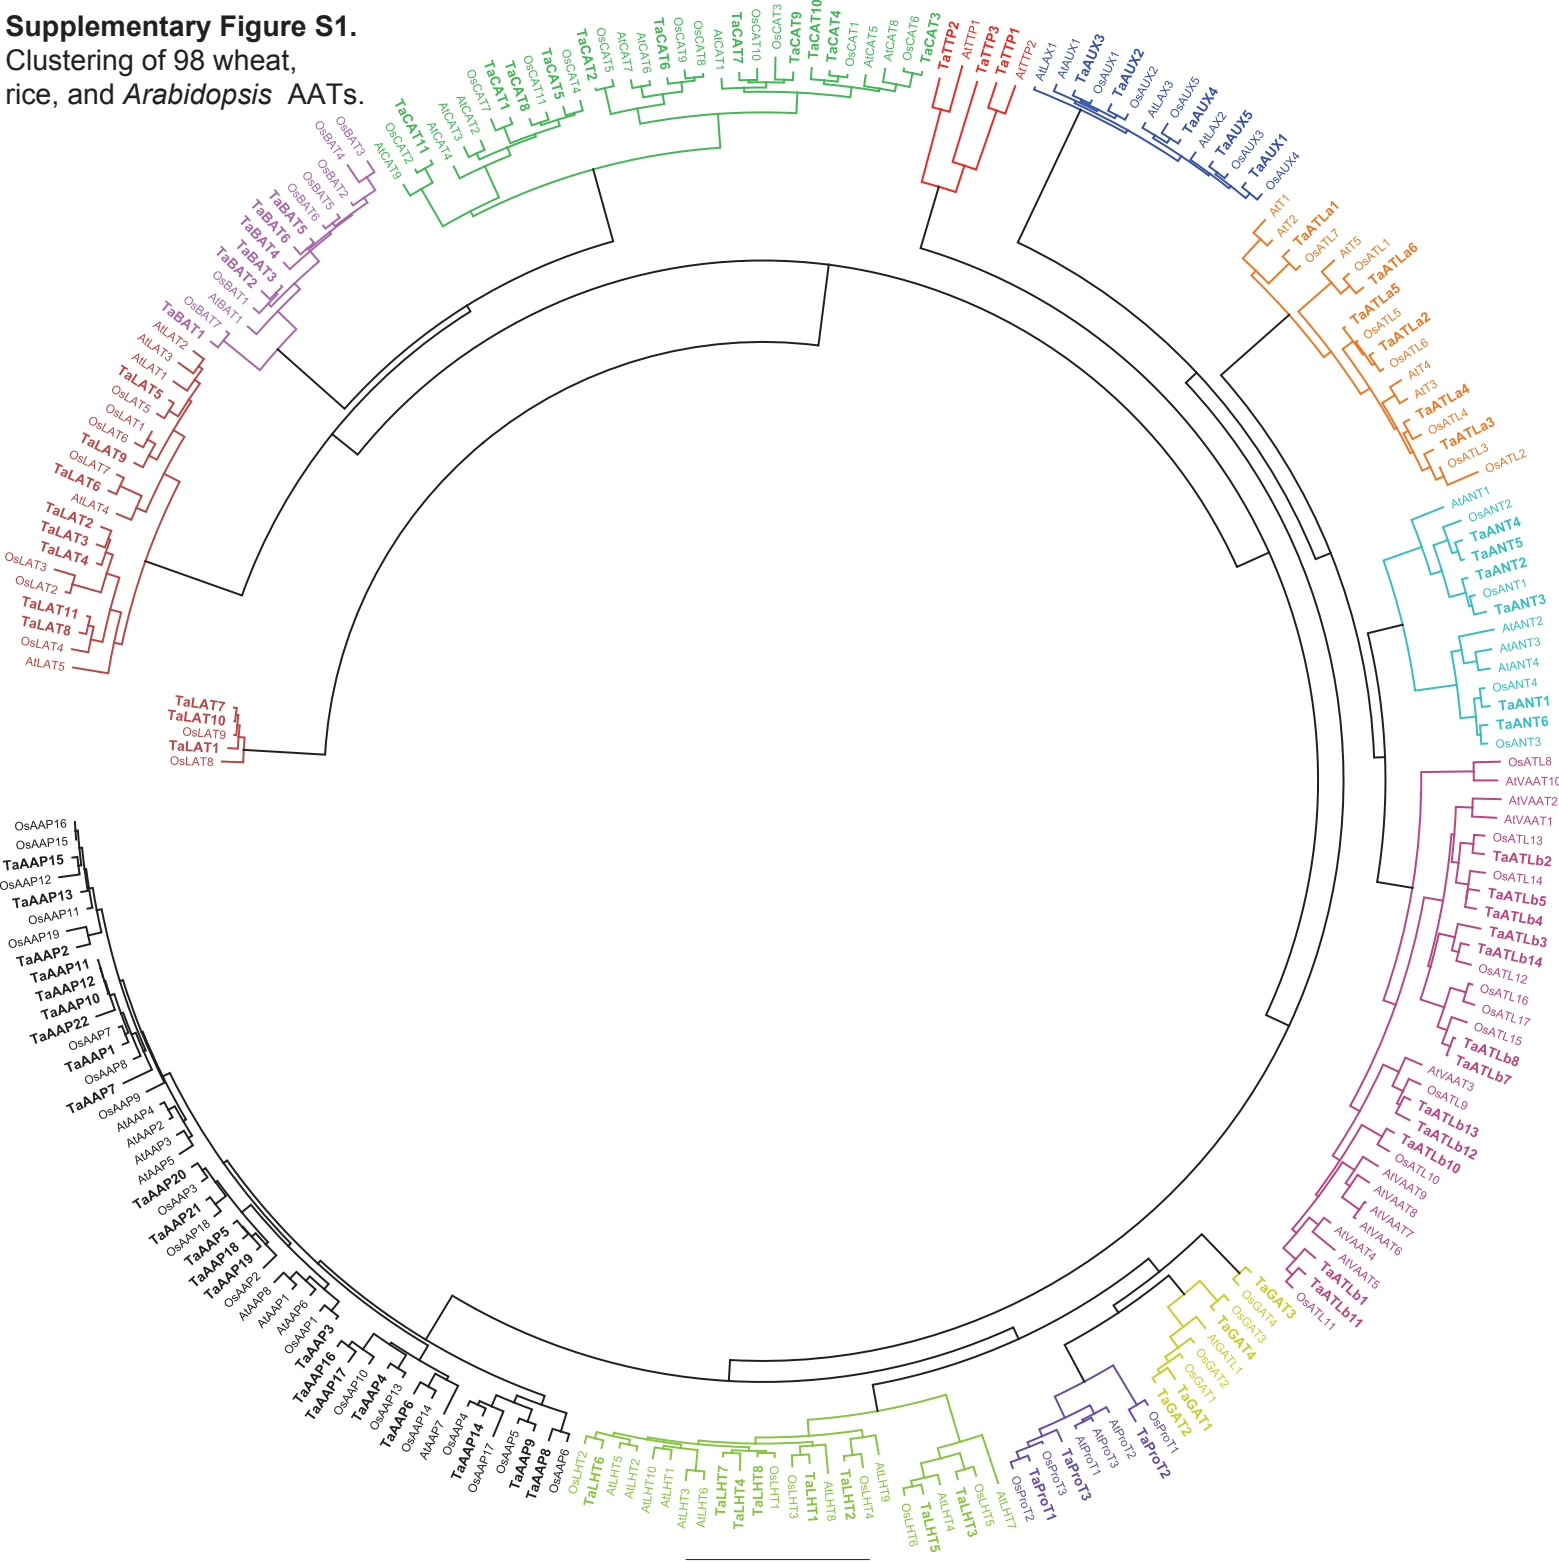

# Supplementary Figure S2a.

Homeolog gene scaled (row) FPKM values from salt stress RNA-seq data.

Genes without at least a single column above FPKM 3.0 before scaling were not included.

Root tissue used.

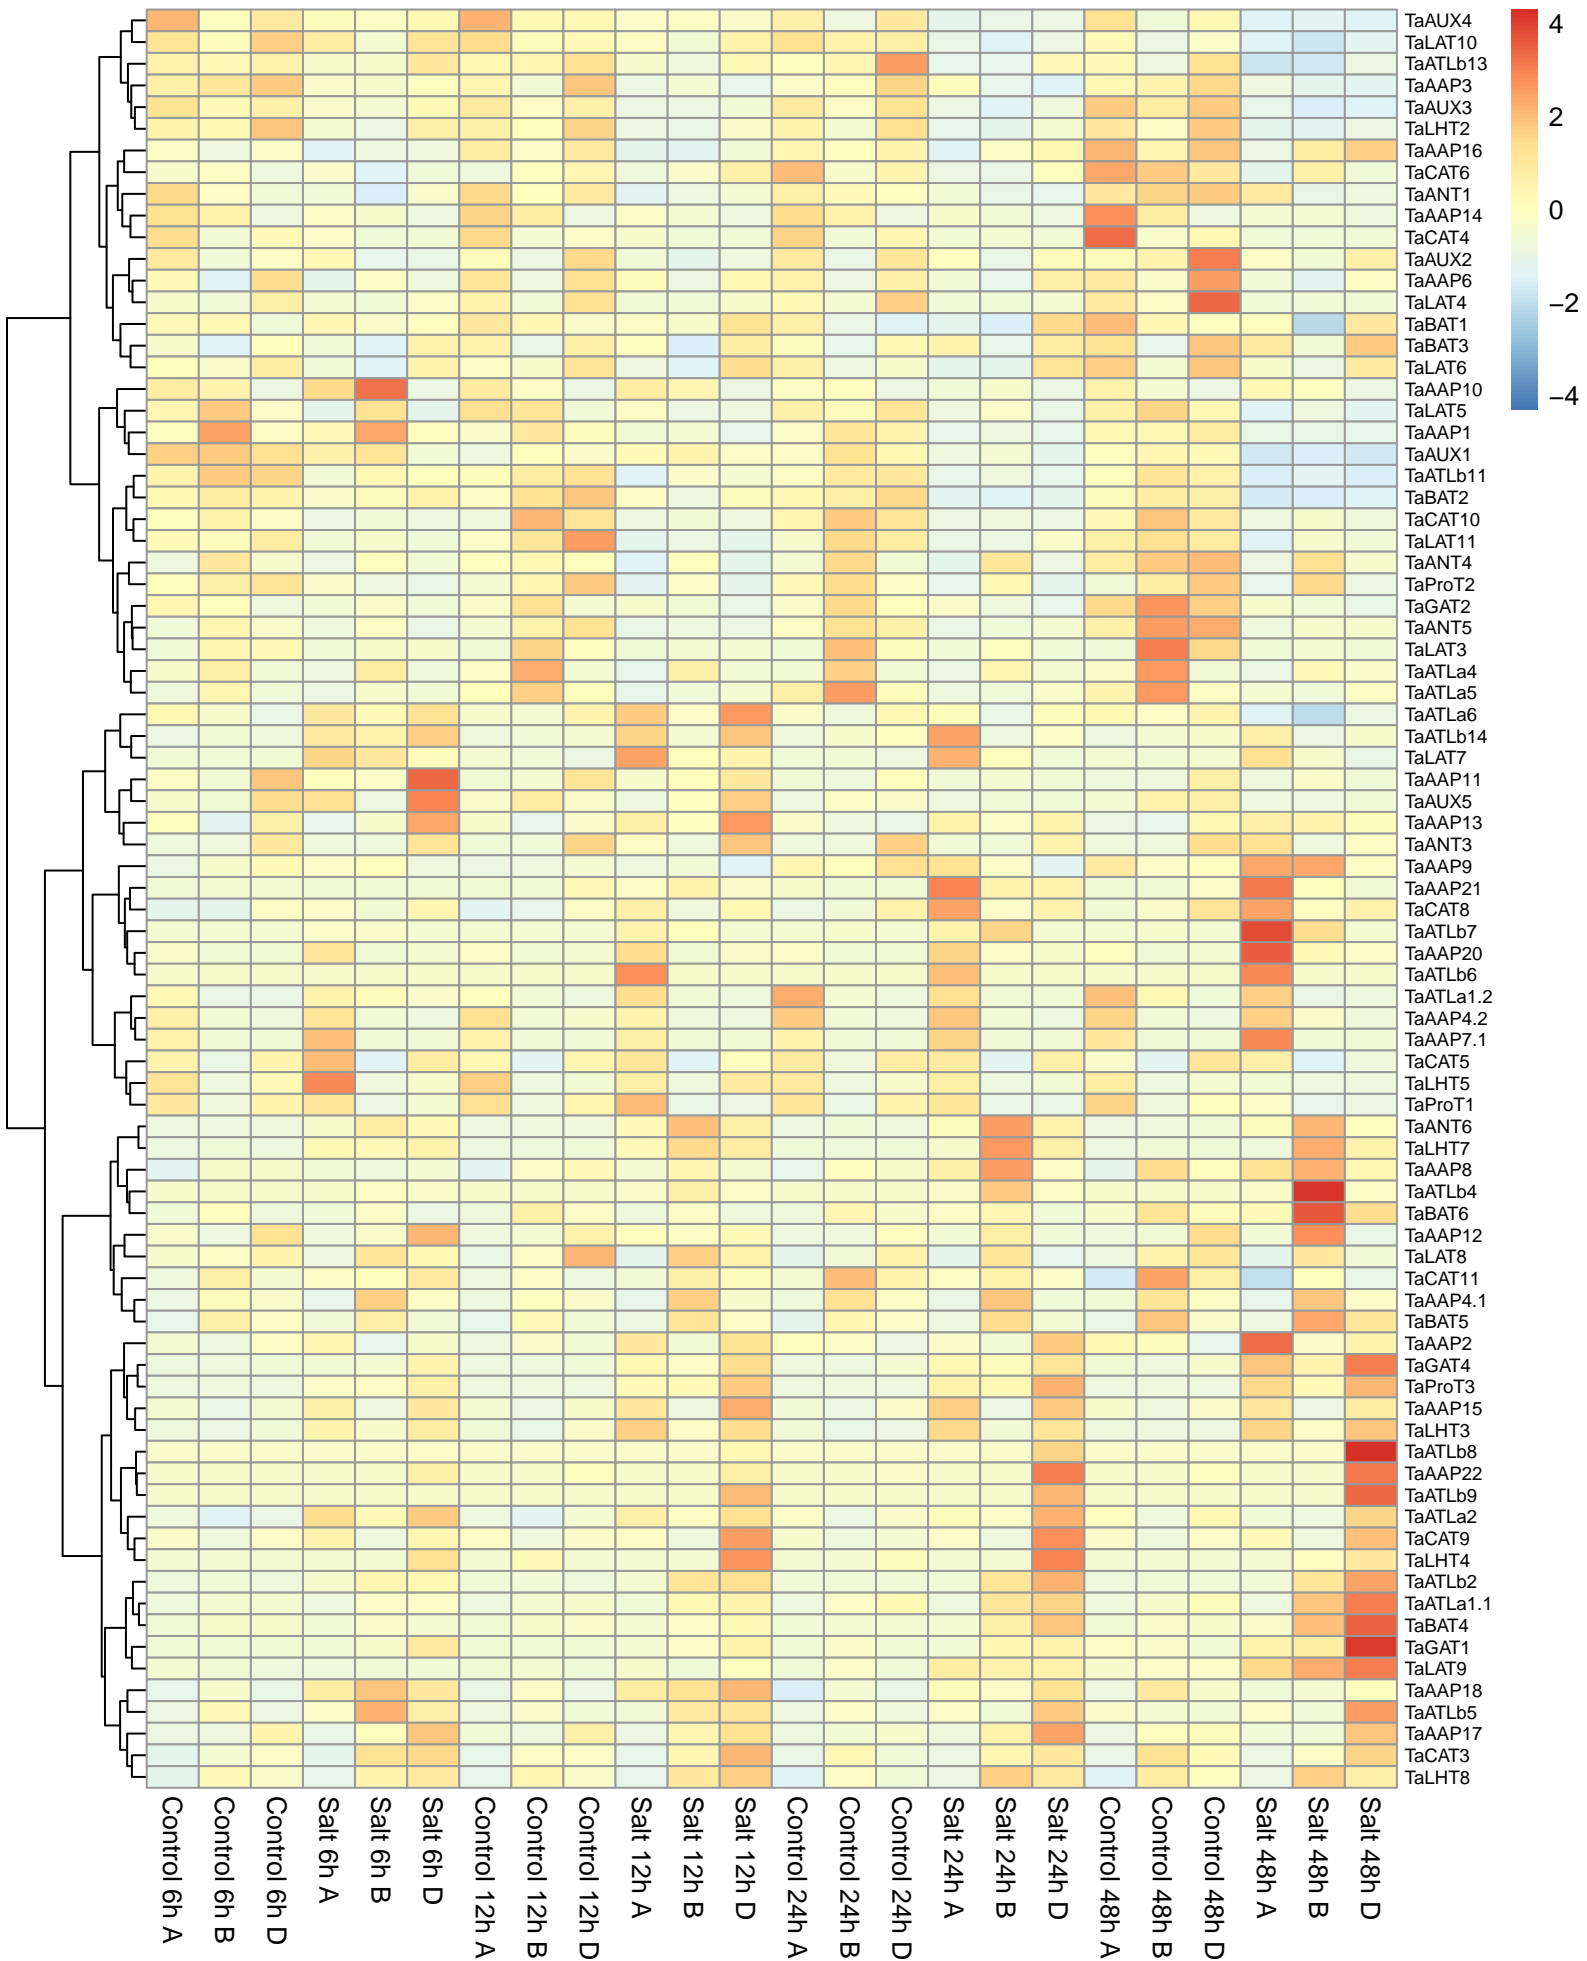

### Supplementary Figure S2b.

Homeolog gene scaled (row) FPKM values from heat and drought RNA-seq data.

Genes without at least a single column above FPKM 3.0 before scaling were not included.

Leaf tissue used.

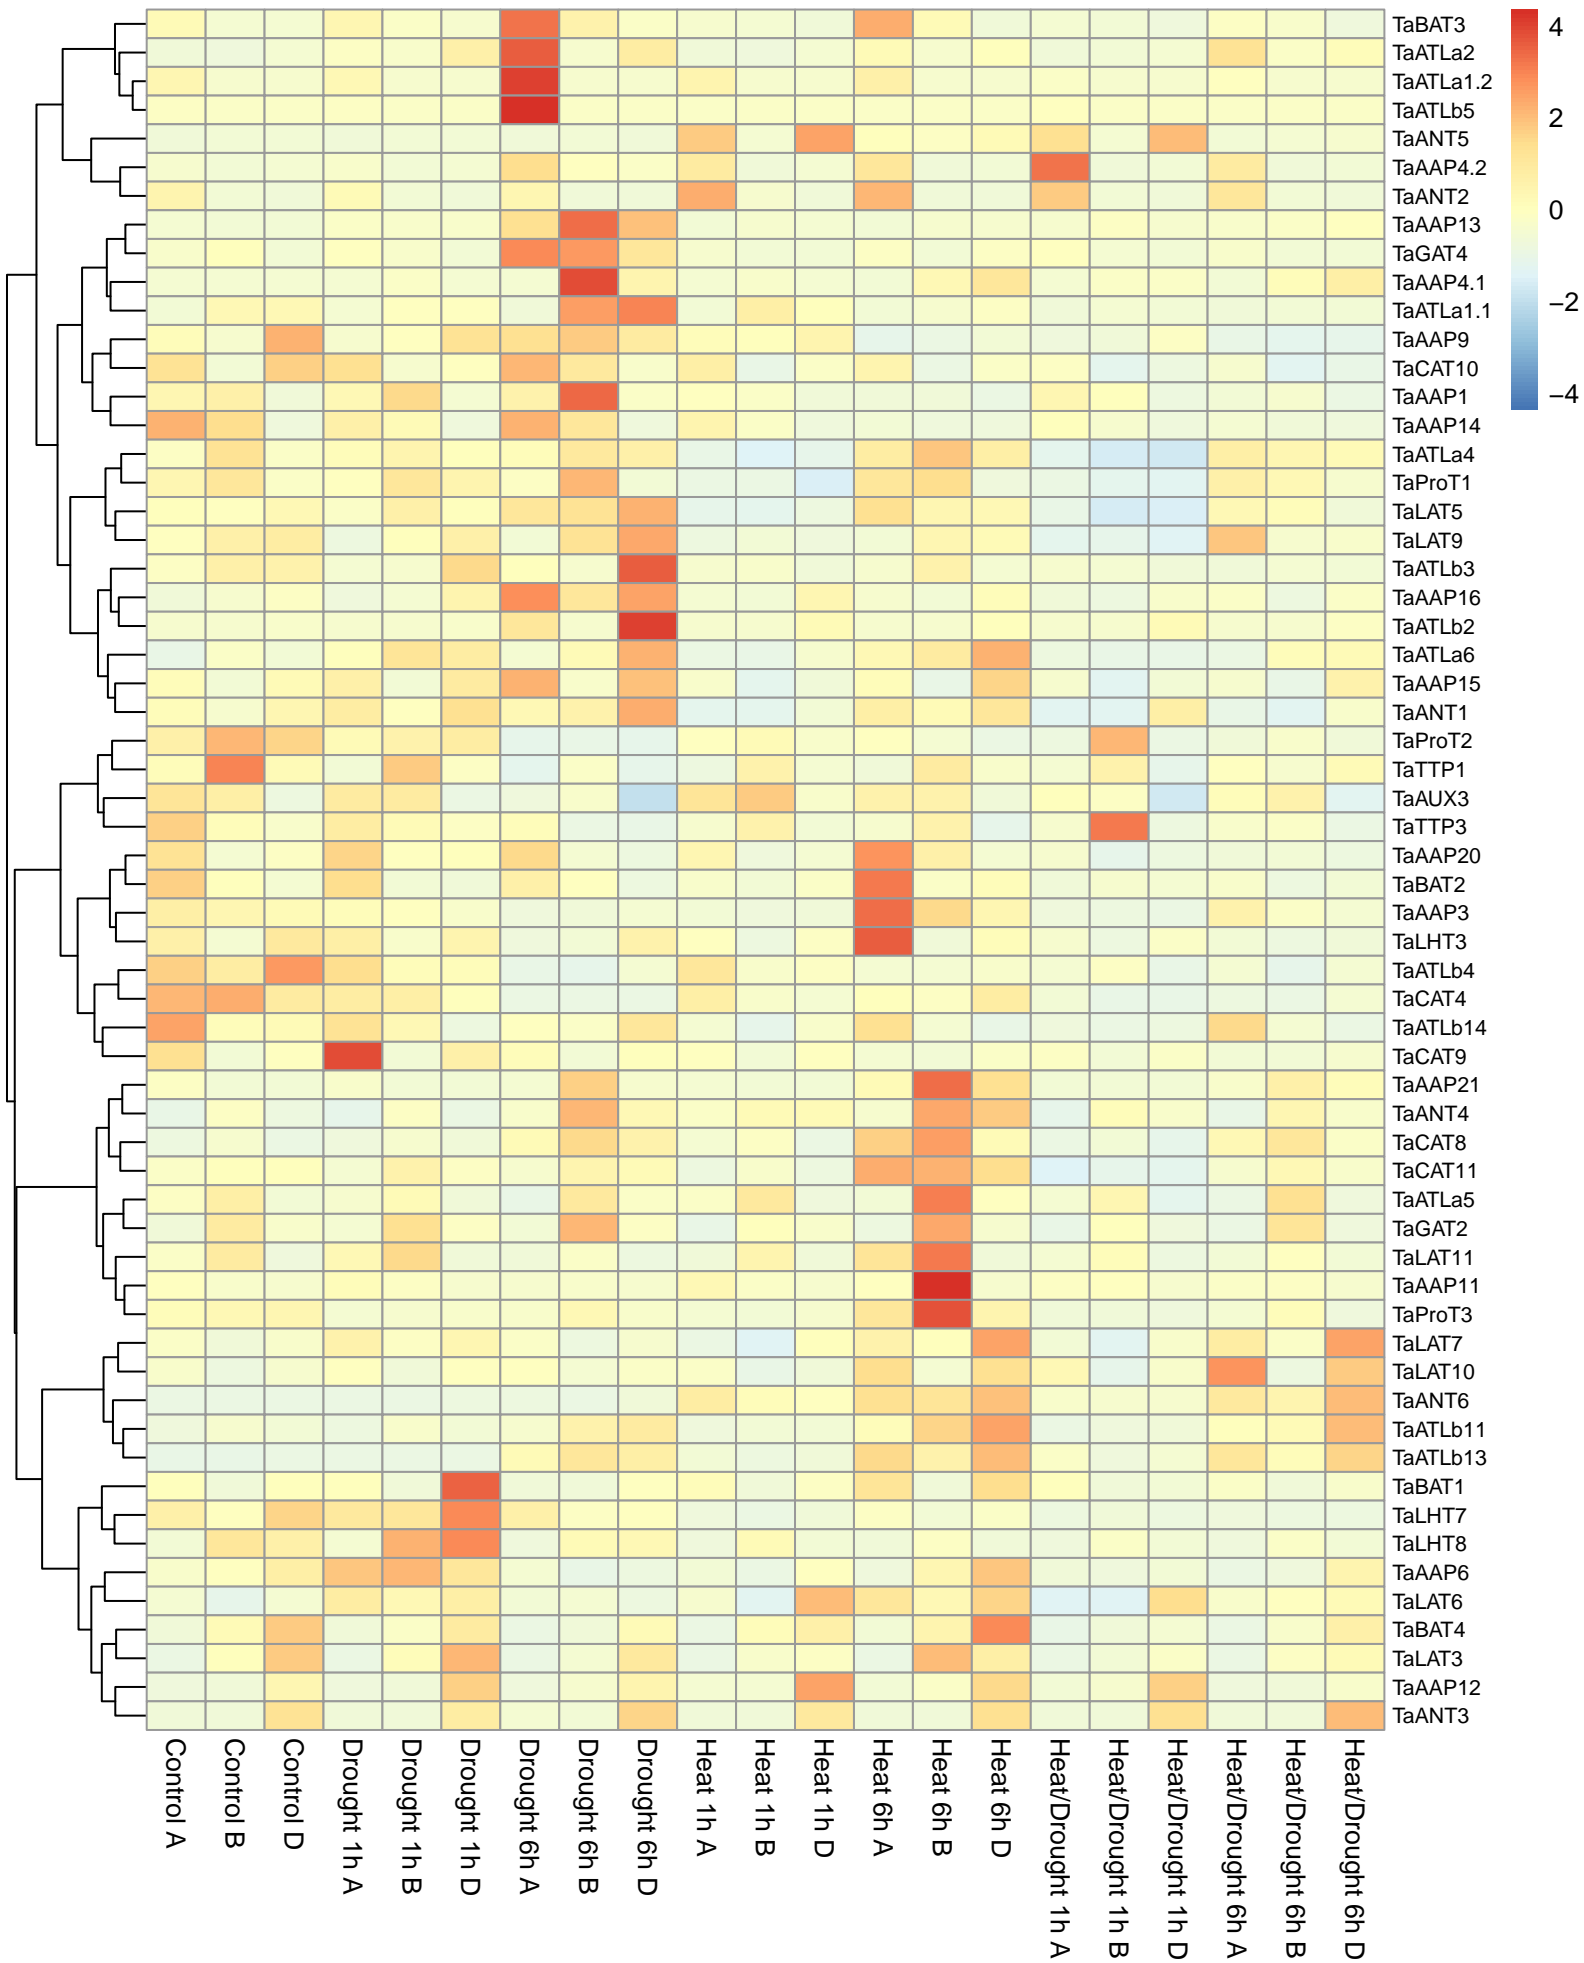

# Supplementary Figure S2c.

Homeolog gene scaled (row) FPKM values from tissue specific RNA-seq data.

Genes without at least a single column above FPKM 3.0 before scaling were not included.

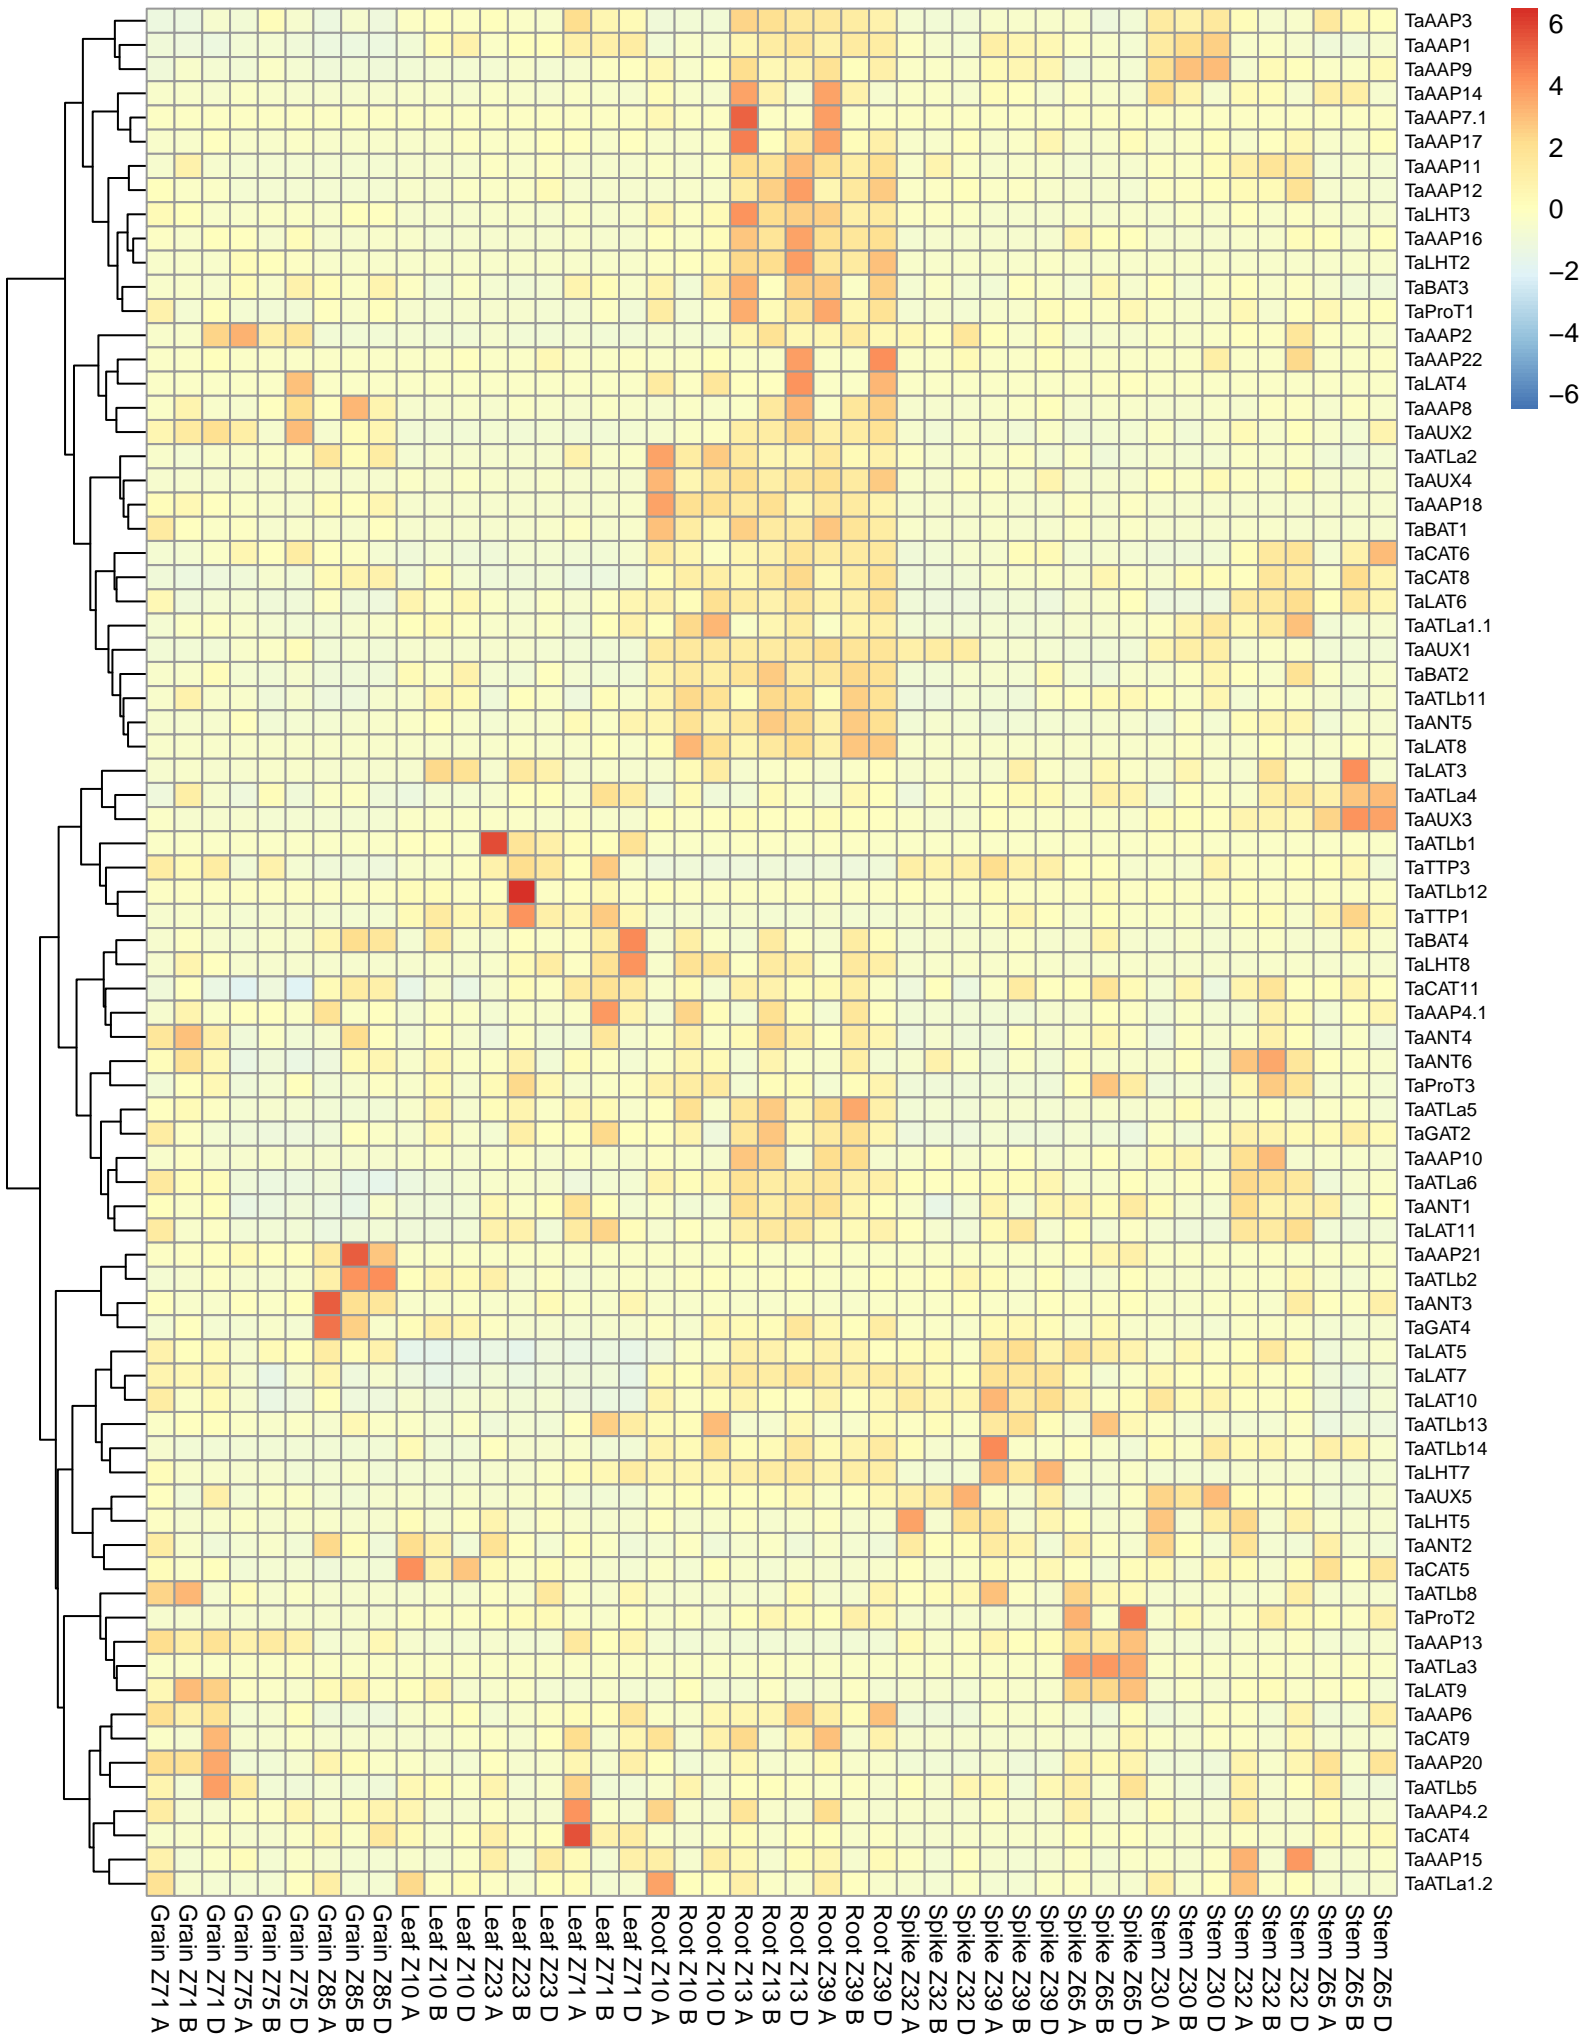



### Supplementary Figure S3.

RNA-seq data expression (FPKM) from different organ tissues of four AATs that were used for qPCR in Figure 6.

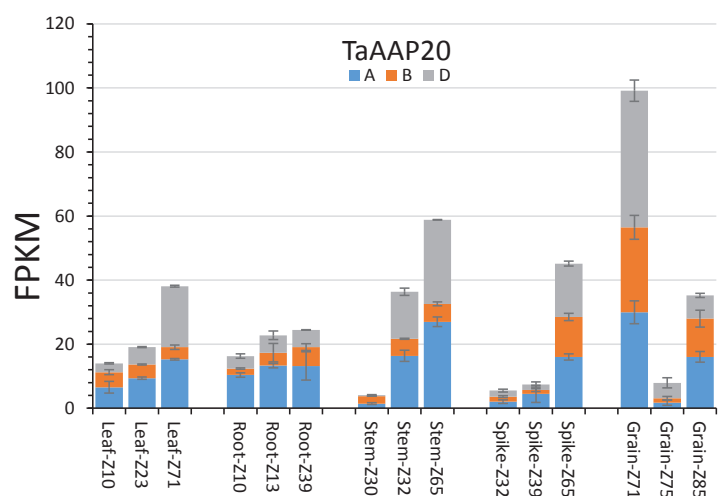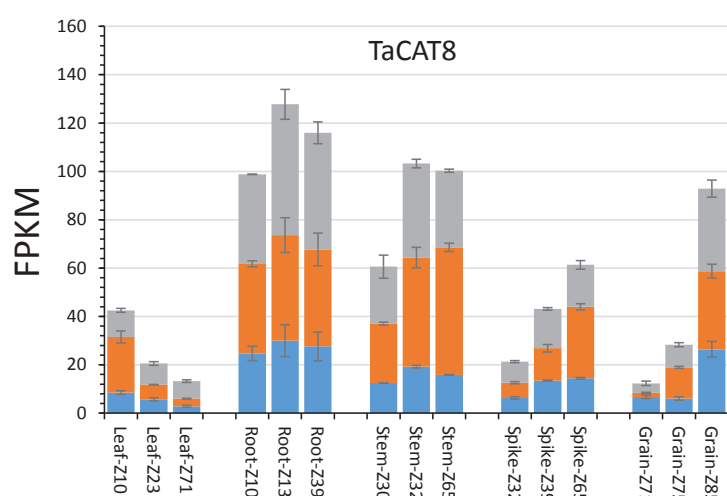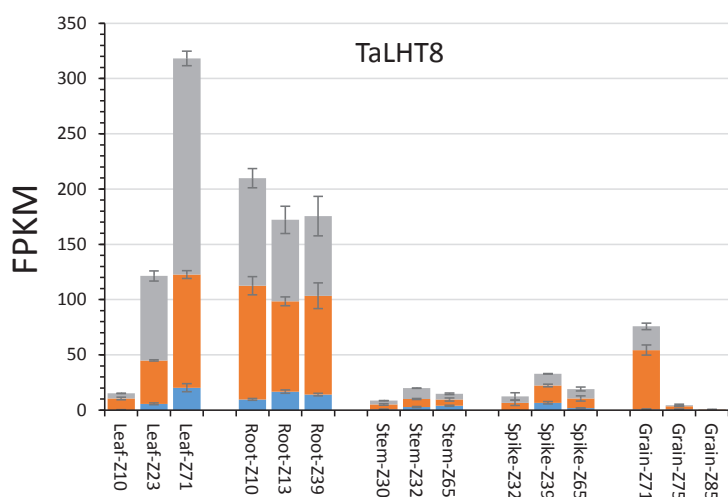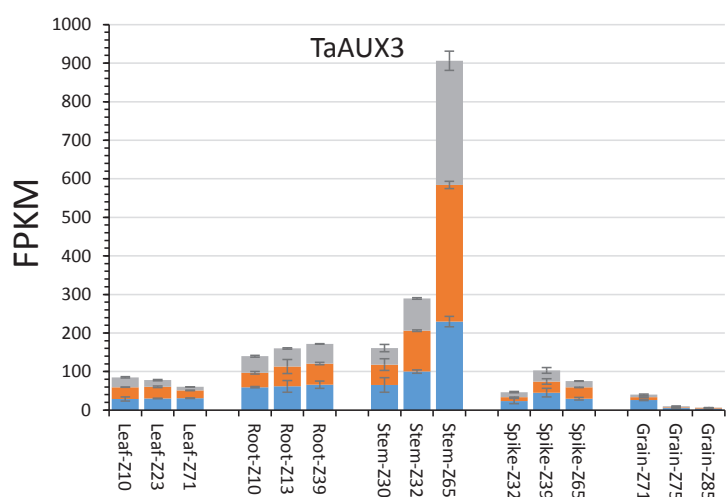

Supplement: 41598_2017_4473_MOESM1_ESM.pdf [file 41598_2017_4473_MOESM1_ESM.pdf]
